# Supplementary material
Source: publisher figshare collection journal article supplement (https://tandf.figshare.com/articles/dataset/_/11507118)
Supplement: Supplementary file 1 [file 2]

ISOPACH MAPS OF PYROCLASTIC DEPOSITS (thickness in cm)

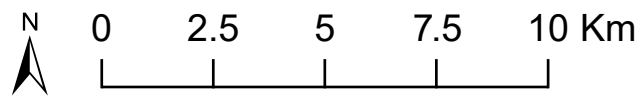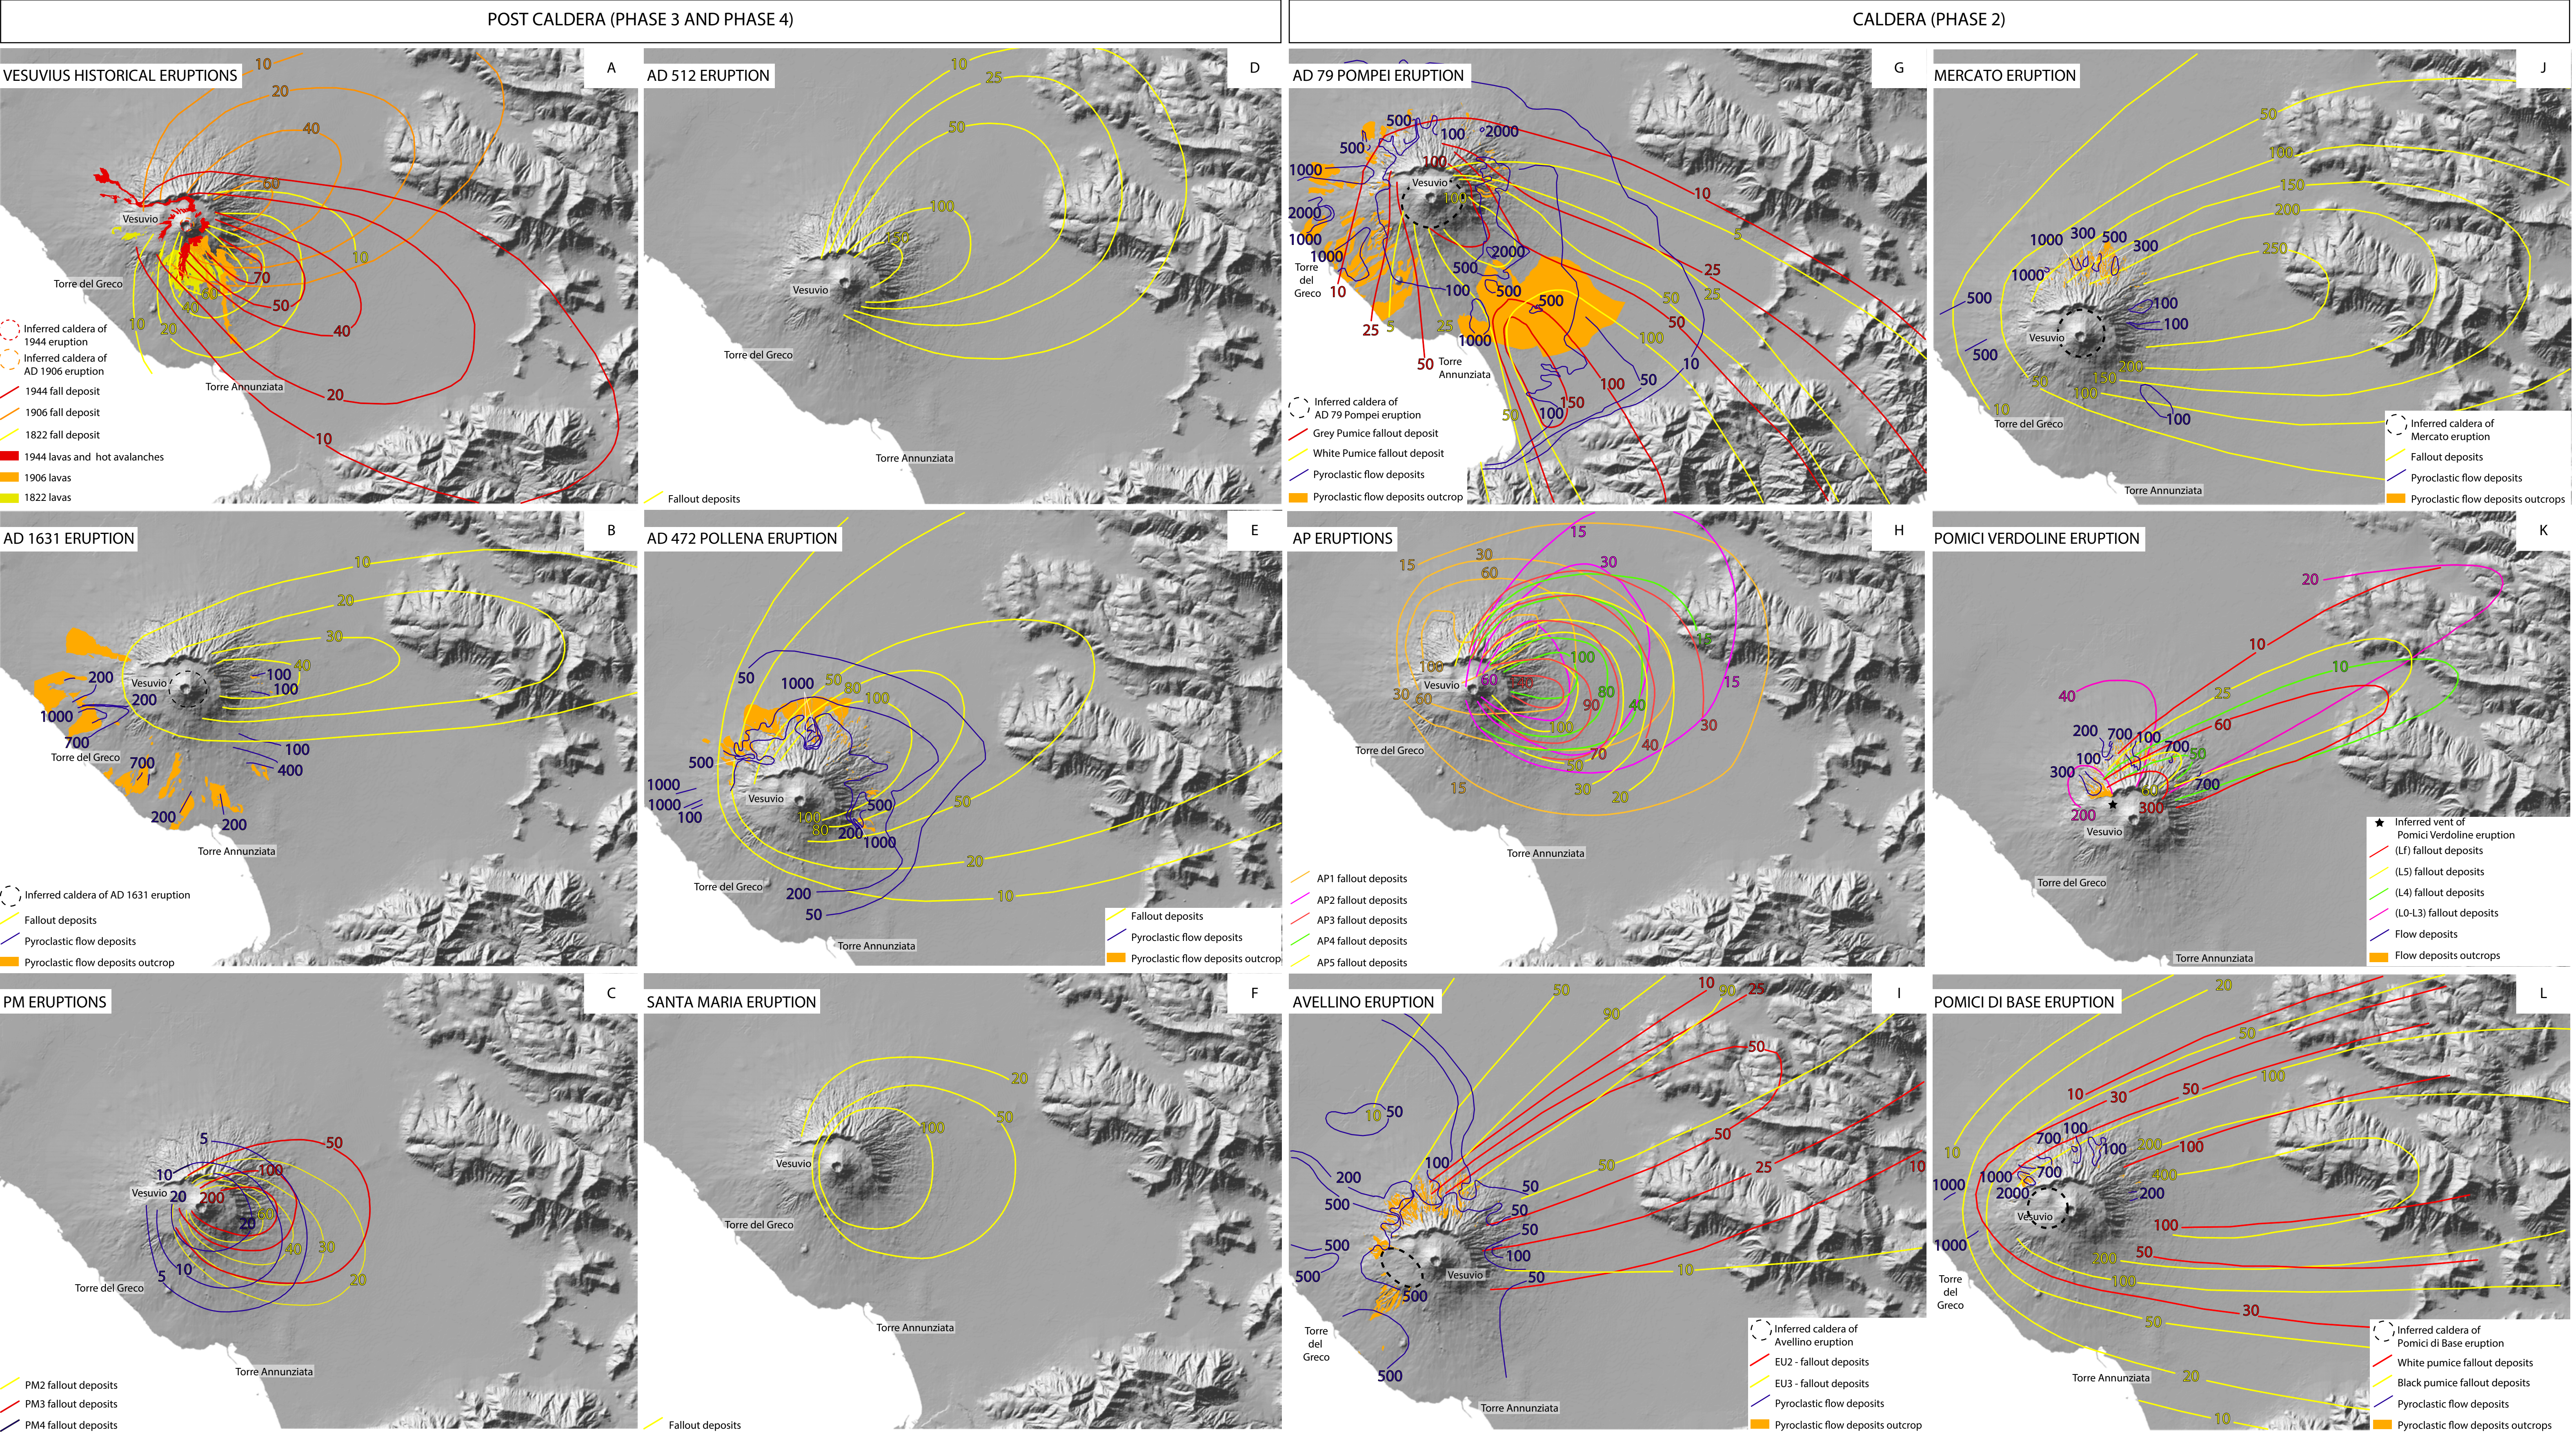

Data source:

Andronico, D., Cioni, R. (2002). Contrasting styles of Mount Vesuvius activity in the period between the Avellino and Pompeii Plinian eruptions, and some implications for assessment of future hazards. *Bulletin of Volcanology*, 64, 372–391. doi:10.1007/s00445-002-0215-4

Arrighi, S., Principe, C., Rosi, M. (2001). Violent strombolian and subplinian eruptions at Vesuvius during post-1631 activity. *Bulletin of Volcanology*, 63, 126–150. doi:10.1007/s004450100130

Bertagnini, A., Landi, P., Santacroce, R. et al. *Bull Volcanol* (1991) The 1906 eruption of Vesuvius: from magmatic to phreatomagmatic activity through the flashing of a shallow depth hydrothermal system53: 517. <https://doi.org/10.1007/BF00298153>

Bertagnini A., Landi P., Rosi M., Vigliarigo A., The Pomici di Base plinian eruption of Somma-Vesuvius *Journal of Volcanology and Geothermal Research* Volume 83, Issues 3–4, 15 August 1998, Pages 219-239 [https://doi.org/10.1016/S0377-0273\(98\)00025-0](https://doi.org/10.1016/S0377-0273(98)00025-0)

Cioni, R., Marianelli, P., Sbrana, A. (1992) Dynamics of the AD 79 eruption: Stratigraphic, sedimentological and geochemical data on the successions from the Somma-Vesuvius southern and eastern sectors. *Acta Vulcanol* 2:109–123.

Cioni, R., Bertagnini, A., Andronico, D. et al. *Bull Volcanol* (2011) The 512 AD eruption of Vesuvius: complex dynamics of a small scale subplinian event 73: 789. <https://doi.org/10.1007/s00445-011-0454-3>

Cioni, R., Sulpizio, R., Garruccio, N. (2003) Variability of the eruption dynamics during a subplinian event: the Greenish Pumice eruption of Somma-Vesuvius (Italy). *J Volcanol Geotherm Res* 124, 89–114

Cioni, R., D’Orlano, C., Bertagnini, A., Andronico, D. (2013). The 2nd to 4th century explosive activity of Vesuvius: New data on the timing of the upward migration of the post-AD 79 magma chamber. *Annals of Geophysics*, 56(4), 50438–17. doi:10.4401/ag-6444

Cole P., Scarpati C. The 1944 eruption of Vesuvius, Italy: combining contemporary accounts and field studies for a new volcanological reconstruction. *Geological Magazine*; 147 (3): 391–415. doi: <https://doi.org/10.1017/S0016756809990495>

D’Orlano C., Cioni R., Bertagnini A., Andronico D., Cole P., 2011. Dynamics of ash-dominated eruptions at Vesuvius: the post-512 AD AS1a event *Bull Volcanol* (2011) 73:699–715 DOI 10.1007/s00445-010-0432-1

Gurioli, L., Sulpizio, R., Cioni, R. et al. *Bull Volcanol* (2010) Pyroclastic flow hazard assessment at Somma–Vesuvius based on the geological record72: 1021. <https://doi.org/10.1007/s00445-010-0379-2>

Mele, D., Sulpizio, R., Dellino, P., La Volpe, L. (2011) - Stratigraphy and eruptive dynamics of a long- lasting Plinian eruption of Somma-Vesuvius: the Pomici di Mercato (8900 years BP). *Bulletin of Volcanology*, 73, 257-278.

Rosi, M., Principe, C., Vecchi, R. (1993). The 1631 Vesuvius eruption. A reconstruction based on historical and stratigraphical data. *Journal of Volcanology and Geothermal Research*, 58(1–4), 151–182. doi:10.1016/0377-0273(93)90106-2

Sigurðsson, H., Carey, S., Cornell, W., Pescatore, T. (1985) The eruption of Vesuvius in A.D. 79. *National Geographic Research* 1,1–55.

Sulpizio, R., Cioni, R., Di Vito, M. A., Mele, D., Bonasia, R., Dellino, P. (2010). The Pomici di Avellino eruption of Somma-Vesuvius (3.9 ka BP). Part I: stratigraphy, compositional variability and eruptive dynamics. *Bulletin of Volcanology*, 72, 539–558. doi:10.1007/s00445-009-0339-x

Sulpizio, R., Mele, D., Dellino, P., La Volpe, L. (2005). A complex, Subplinian-type eruption from low-viscosity, phonolitic to tephri-phonolitic magma: the AD 472 (Pollena) eruption of Somma-Vesuvius, Italy. *Bulletin of Volcanology*, 67, 743–767. doi:10.1007/s00445-005-0414-x

and Cioni unpublished data
